# Supplementary material
Source: PubMed Central journal article supplement (PMC1569191)

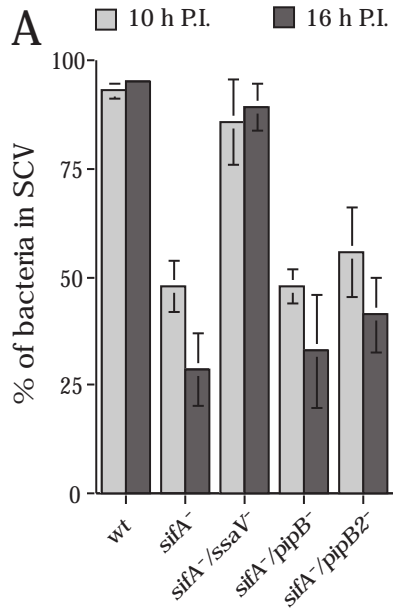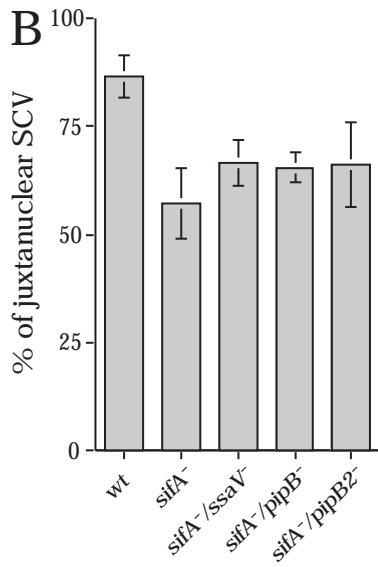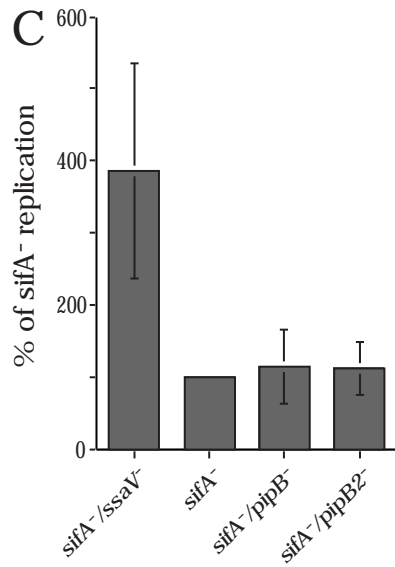

Supplement: pnas_0605443103_1.pdf [file pnas_0605443103_1.pdf]

**A***sifA*-/*pipB2*- mutant strains secreting 2HA tagged :

PipB2    PipB2( 341-345)    PipB

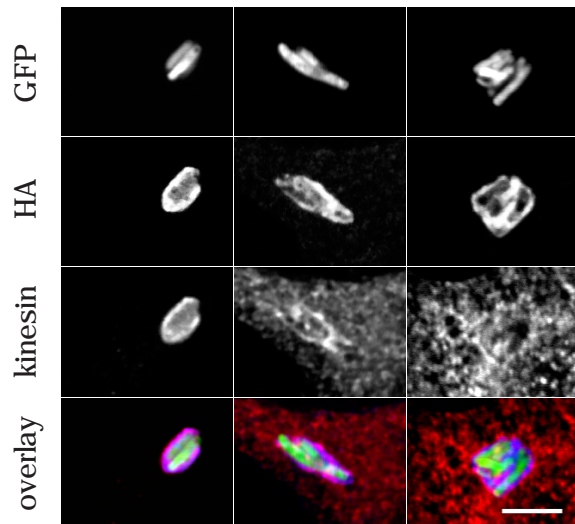**B**

△ PipB2.2HA

○ PipB2( 341-345).2HA

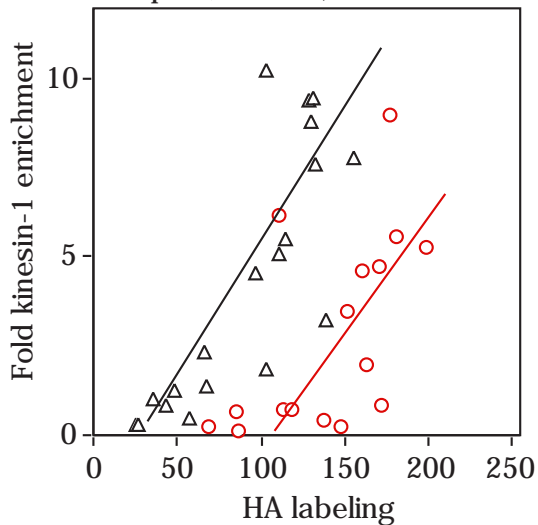

Supplement: pnas_0605443103_2.pdf [file pnas_0605443103_2.pdf]
